# Supplementary material for: Targeting Antisense lncRNA PRKAG2-AS1, as a Therapeutic Target, Suppresses Malignant Behaviors of Hepatocellular Carcinoma Cells
Source: Front Med (Lausanne). 2021 Apr 13;8:649279. doi: 10.3389/fmed.2021.649279 (PMC8076551; doi:10.3389/fmed.2021.649279)
Supplement: Supplementary file 1 [file Table_1.XLSX]

## Sheet: Sheet1
HCCML3
PRKAG2-AS1-WT
	NC mimics		miR-502-3p mimics			NC inhibitors		miR-502-3p inhibitors
	1.054		0.323			1.032		5.656
	0.978		0.297			0.967		5.132
	1.123		0.311			1.123		6.223
PRKAG2-AS1-MuT
	NC mimics		miR-502-3p mimics			NC inhibitors		miR-502-3p inhibitors
	1.112		0.978			1.112		0.943
	0.965		0.988			0.971		0.987
	1.067		1.087			1.067		1.121
PLC5
PRKAG2-AS1-WT
	NC mimics		miR-502-3p mimics			NC inhibitors		miR-502-3p inhibitors
	1.045		0.323			0.967		1.076
	0.976		0.287			1.113		0.987
	1.132		0.332			1.065		0.956
PRKAG2-AS1-MuT
	NC mimics		miR-502-3p mimics			NC inhibitors		miR-502-3p inhibitors
	1.042		0.967			0.976		1.055
	0.967		1.054			1.134		0.976
	1.134		1.113			1.042		1.123
